# Supplementary material for: Co-Infection and Ventilator-Associated Pneumonia in Critically Ill COVID-19 Patients Requiring Mechanical Ventilation: A Retrospective Cohort Study
Source: MDPI journal article supplement (doi:10.3390/biomedicines10081952), 2022-08-11

**Figure S1: Cumulative probability of death.** Kaplan Meyer survival analysis from intubation to day 28. Patient with COVID-19-ARDS (red line) or H1N1-ARDS (blue line).

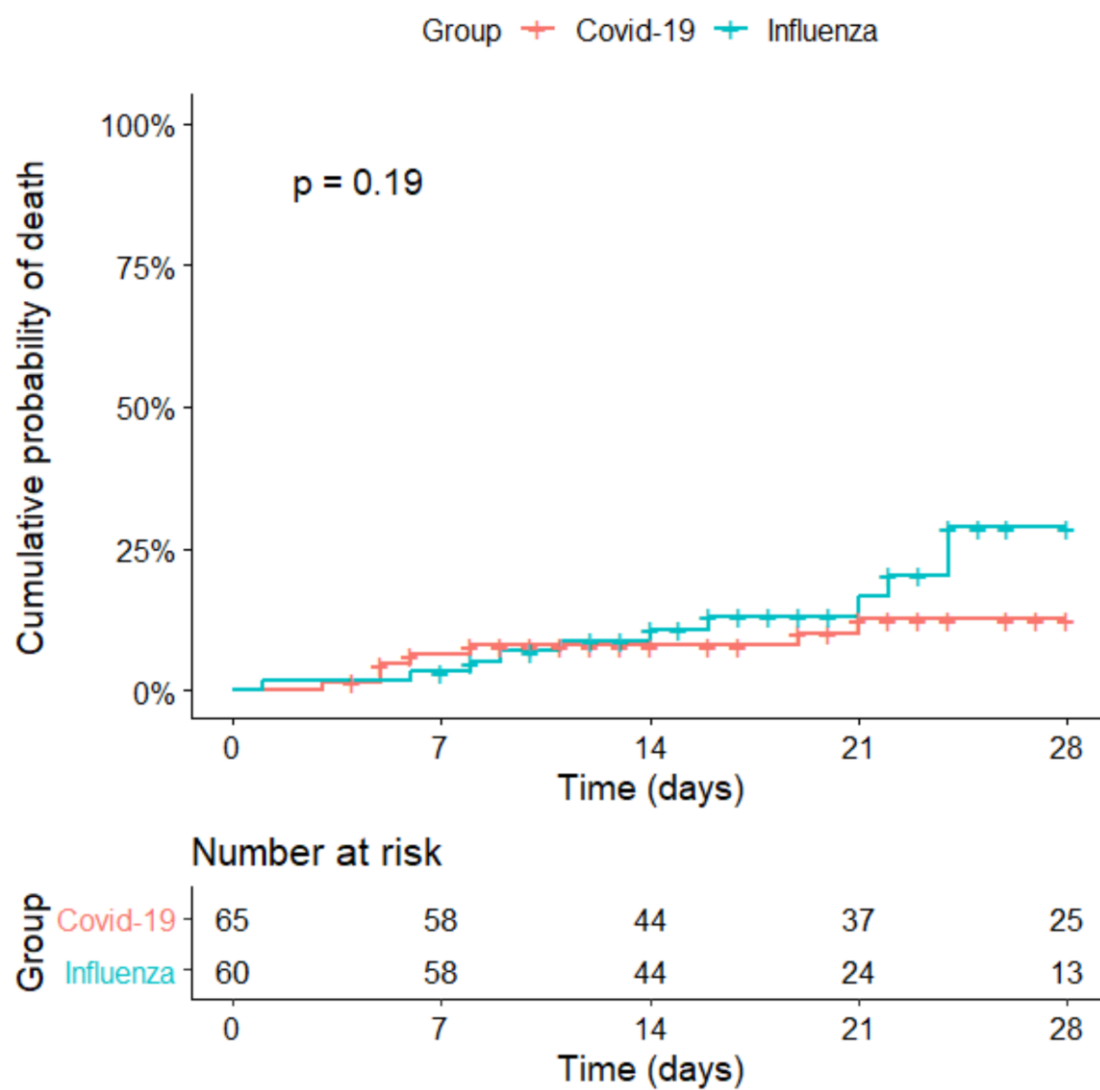

Supplement: s1 [file s1]
