# Supplementary material for: Co-Infection and Ventilator-Associated Pneumonia in Critically Ill COVID-19 Patients Requiring Mechanical Ventilation: A Retrospective Cohort Study
Source: MDPI journal article supplement (doi:10.3390/biomedicines10081952), 2022-08-11
Supplement: s1 [file s1]

**Table S1: Risk factors of ventilator associated pneumonia.**

|                                           | Total (n = 125) | Influenza (n=60) | COVID-19 (n = 65) | <i>p</i> |
|-------------------------------------------|-----------------|------------------|-------------------|----------|
| Demographics                              |                 |                  |                   |          |
| Male gender                               | 92 (74)         | 39 (65)          | 53 (82)           | 0.058    |
| Underlying medical conditions             |                 |                  |                   |          |
| Diabetes                                  | 21 (16)         | 6 (9)            | 15 (25)           | 0.034    |
| COPD                                      | 15 (12)         | 10 (15)          | 5 (7)             | 0.192    |
| Immunocompromised                         | 11 (8)          | 7 (11)           | 4 (6)             | 0.440    |
| Solid tumour                              | 15 (12)         | 7 (11)           | 8 (12)            | 1.000    |
| Characteristics at baseline               |                 |                  |                   |          |
| SAPS II <sup>c</sup>                      | 37 [31 – 43]    | 36 [31 – 46]     | 37 [32 – 42]      | 0.748    |
| SOFA <sup>d</sup>                         | 7 [6 – 9]       | 8 [6 – 9]        | 7 [5 – 8]         | 0.003    |
| PaO <sub>2</sub> /FiO <sub>2</sub> (mmHg) | 137 [107 – 168] | 138 [103 – 158]  | 136 [109 – 175]   | 0.168    |
| Glasgow coma scale                        | 15 [15 – 15]    | 15 [15 – 15]     | 15 [15 – 15]      | 0.330    |
| ICU management                            |                 |                  |                   |          |
| Invasive mechanical ventilation, days     | 14 [8 – 21]     | 13 [8 – 21]      | 14 [8 – 22]       | 0.397    |
| Prone positioning                         | 62 (49)         | 18 (30)          | 44 (73)           | < 0.001  |
| Tracheostomy                              | 21 (15)         | 4 (3)            | 17 (26)           | 0.007    |
| ECMO                                      | 19 (15)         | 15 (25)          | 4 (6)             | 0.007    |
| Muscle blockade use                       | 110 (88)        | 53 (88)          | 57 (87)           | 1.000    |
| Antibiotic therapy at admission           | 125 (100)       | 60 (100)         | 65(100)           | 1.000    |
| Stress ulcer prophylaxis (PPI)            | 71 (56)         | 35 (58)          | 39 (60)           | 0.994    |
| Selective digestive decontamination       | 0 (0%)          | 0(0%)            | 0(0%)             | 1.000    |

Underlying condition and ICU management considered as potential risk factors of AVP.

Abbreviations: COPD= chronic obstructive pulmonary disease; ECMO= extracorporeal membrane oxygenation; PPI= proton pump inhibitors.
